# Supplementary material
Source: PubMed Central journal article supplement (PMC8792440)
Supplement: bioinformatics_36_1_41_s6.pdf [file bioinformatics_36_1_41_s6.pdf]

# Supplementary Materials

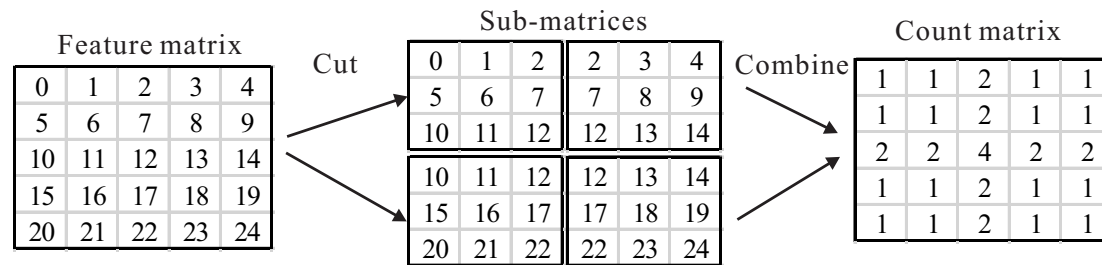

**Figure S1.** Demonstration for the cut-and-combine procedure in the min-batch training of the DeepMeta method. The numbers in the feature matrix and the sub-matrices indicate the identities of elements. The numbers in the count matrix indicate the appearing frequencies of the corresponding elements in the sub-matrices.

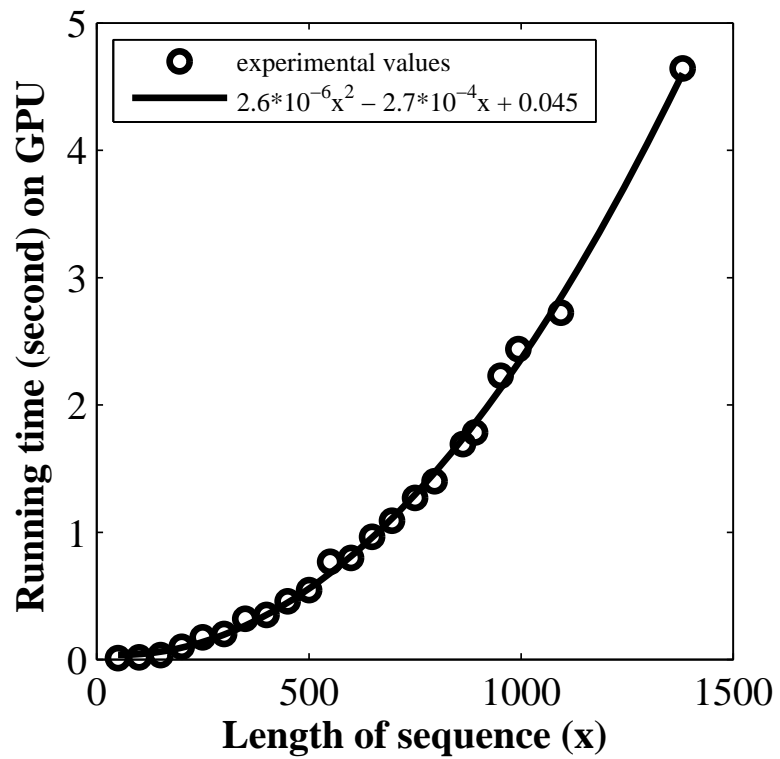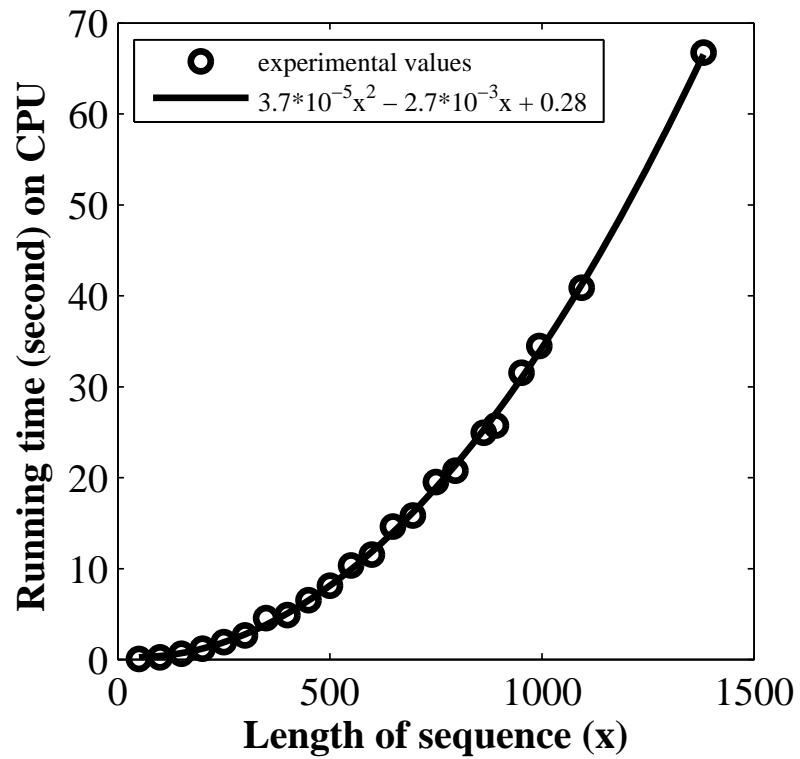

Figure S2. Running time of contact predictions for sequences with different lengths.

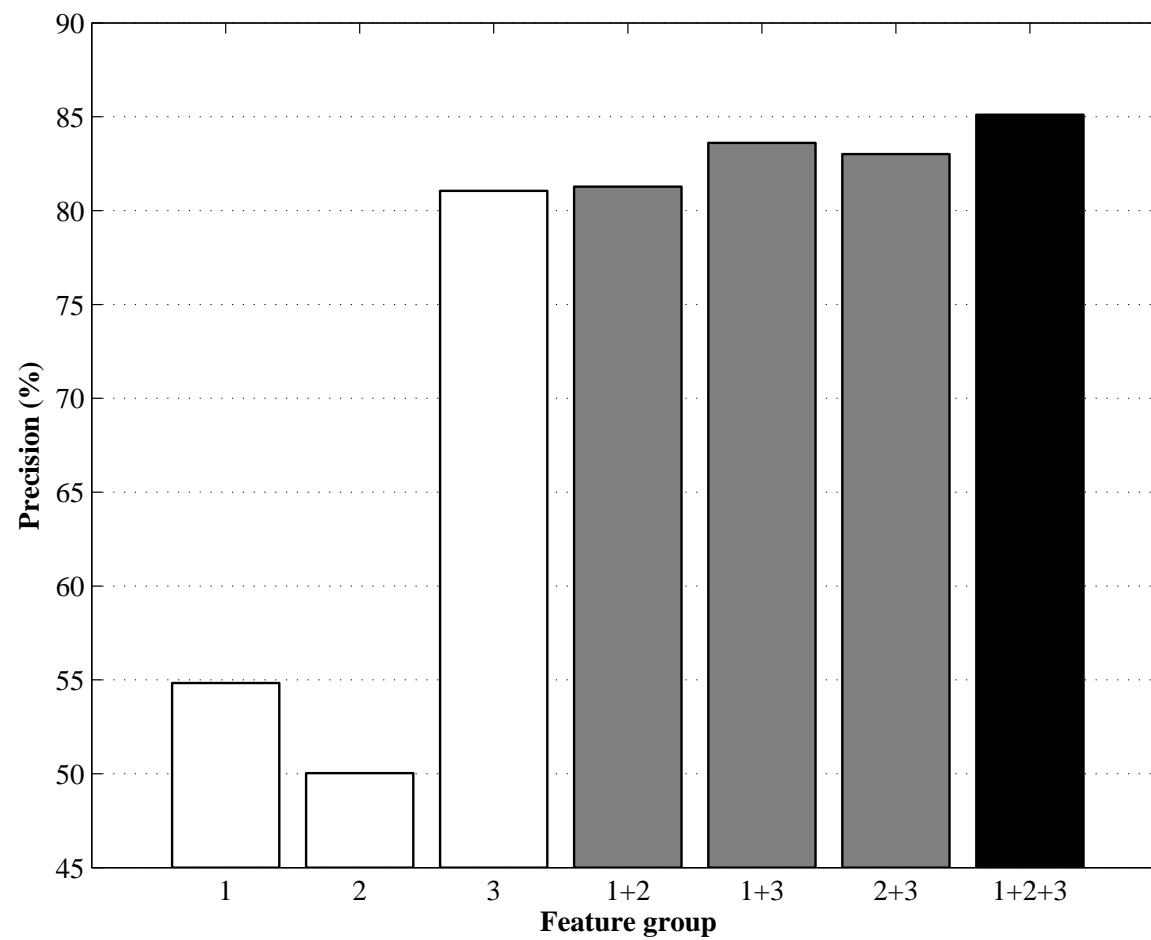

**Figure S3.** The precision of the predicted contact maps for the validation set with different feature groups. (1) CCMpred-based feature; (2) Sequence profile features, including SS, RSA and the Frobenius norm; and (3) DeepMSA-based feature.

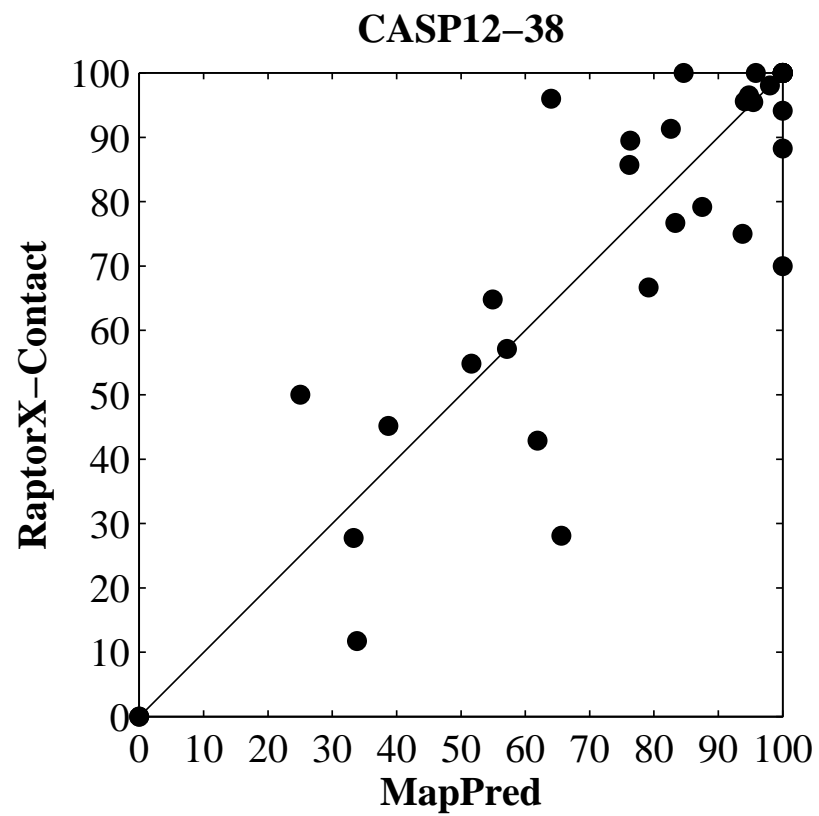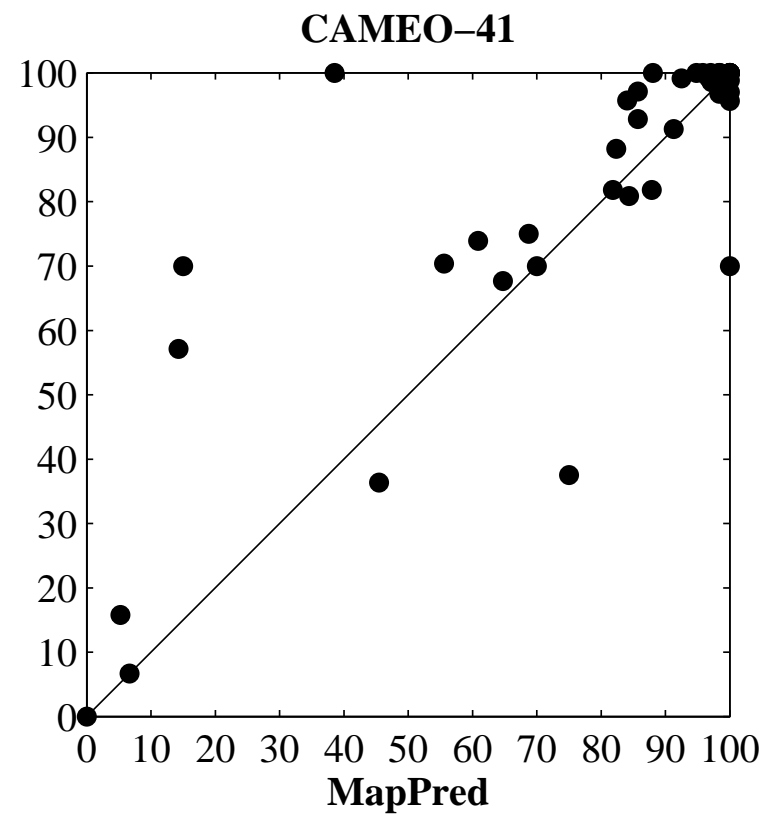

**Figure S4.** Head-to-head comparison between MapPred and RaptorX-Contact's top L/5 long-range precisions on the datasets CASP12-38 and CAMEO-41.

**RR Analysis**

[Results Home](#)
[Table Browser](#)
[Estimate of Model Accuracy Results](#)
[RR Assessment Results](#)

[Per Group/Target Analysis](#)
[Averages](#)
[Zscores](#)
[Similarity\(Jaccard dist.\)](#)
[Help](#)

[Per Group](#)
[Per Target](#)

Contact Range: 
 List size: 
 Prob filter: 
[Text file](#)

**Domains classification**

- TBM/FM
- FM

| #  | Gr.# | Gr. Name        | No. Domains |          | F1      |        | Prec    |        | Recall  |        | ES      |       | ES(ext) |        |
|----|------|-----------------|-------------|----------|---------|--------|---------|--------|---------|--------|---------|-------|---------|--------|
|    |      |                 | No Submit.  | No Total | Submit. | Total  | Submit. | Total  | Submit. | Total  | Submit. | Total | Submit. | Total  |
| 1  | 498  | RaptorX-Contact | 32          | 32       | 46.410  | 46.410 | 60.221  | 60.221 | 39.893  | 39.893 | 5.914   | 5.914 | 31.907  | 31.907 |
| 2  | 032  | TripletRes      | 32          | 32       | 46.297  | 46.297 | 59.826  | 59.826 | 39.805  | 39.805 | 5.887   | 5.887 | 31.879  | 31.879 |
| 3  | 323  | TripletRes_AT   | 31          | 32       | 44.761  | 43.362 | 57.997  | 56.184 | 38.498  | 37.295 | 5.920   | 5.735 | 32.016  | 31.016 |
| 4  | 180  | ResTriplet      | 32          | 32       | 44.815  | 44.815 | 57.873  | 57.873 | 38.696  | 38.696 | 5.914   | 5.914 | 31.907  | 31.907 |
| 5  | 164  | Yang-Server     | 29          | 32       | 42.218  | 38.260 | 55.097  | 49.932 | 36.146  | 32.757 | 4.275   | 3.875 | 27.378  | 24.811 |
| 6  | 352  | RRMD-plus       | 31          | 32       | 42.249  | 40.929 | 54.831  | 53.118 | 36.495  | 35.354 | 5.834   | 5.652 | 31.889  | 30.893 |
| 7  | 106  | RRMD            | 32          | 32       | 41.790  | 41.790 | 54.379  | 54.379 | 36.006  | 36.006 | 5.773   | 5.773 | 31.712  | 31.712 |
| 8  | 125  | ResTriplet_AT   | 31          | 32       | 41.022  | 39.740 | 53.885  | 52.201 | 34.480  | 33.403 | 5.983   | 5.796 | 32.082  | 31.079 |
| 9  | 491  | DMP             | 32          | 32       | 41.057  | 41.057 | 53.368  | 53.368 | 35.273  | 35.273 | 5.292   | 5.292 | 30.757  | 30.757 |
| 10 | 036  | Zhang_Contact   | 32          | 32       | 39.844  | 39.844 | 51.638  | 51.638 | 34.445  | 34.445 | 5.914   | 5.914 | 31.907  | 31.907 |

**Figure S5.** The screenshot of the CASP13 website: [http://predictioncenter.org/casp13/rrc\\_avrg\\_results.cgi](http://predictioncenter.org/casp13/rrc_avrg_results.cgi), which is for the ranking of the **top L long+medium-range** predictions.

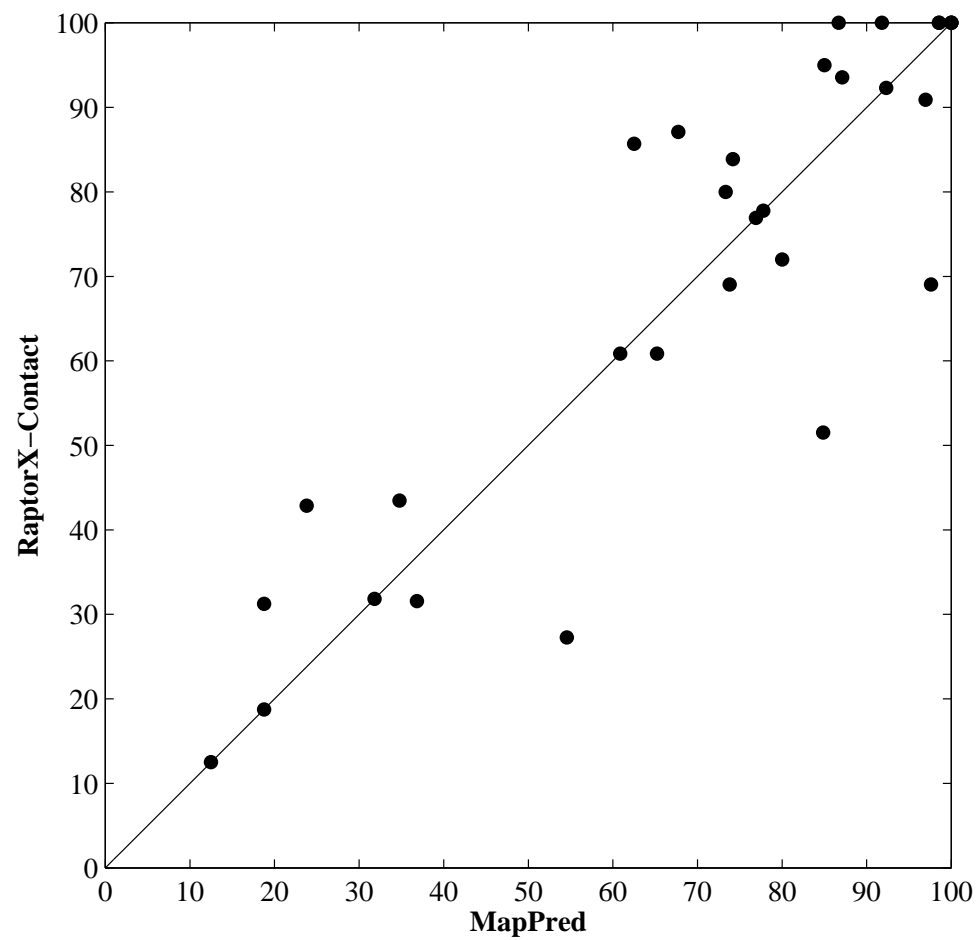

**Figure S6.** Head-to-head comparison between MapPred and RaptorX-Contact's top L/5 long-range precisions on the 31 FM domains from CASP13.

**Table S1.** The long-range precisions on the validation set for several neural networks in DeepMSA. Note that a single model was used to save computing time. The respective network architectures (A-C) are shown in the Figure below.

| Network            | $L/10$ | $L/5$ | $L/2$  | $L$   |
|--------------------|--------|-------|--------|-------|
| CNN (A)            | 0.795  | 0.731 | 0.5864 | 0.439 |
| Common ResNet (B)  | 0.825  | 0.769 | 0.635  | 0.483 |
| Dilated ResNet (C) | 0.831  | 0.773 | 0.636  | 0.484 |

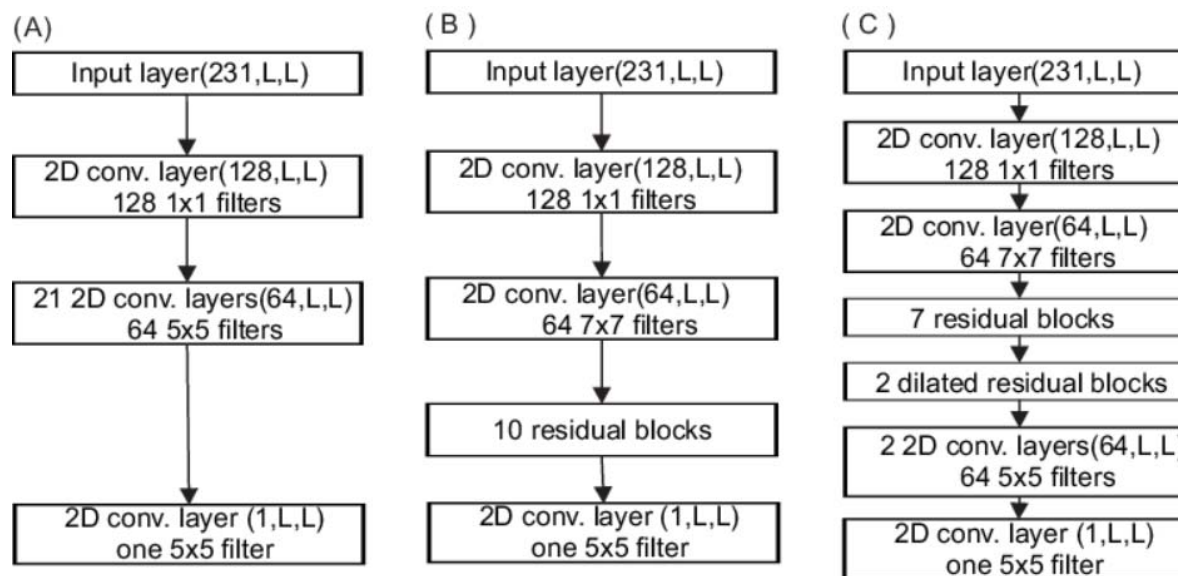

**Table S2.** The long-range precisions of DeepMSA on the validation set for several ways of using the original 441 channels. Note that a single model was used and each model was trained on 2000 sequences randomly selected from training set, to save training time and computer memory.

| No | L/10  | L/5   | L/2   | L     | #Channels | Remark                                                                            | Symmetric |
|----|-------|-------|-------|-------|-----------|-----------------------------------------------------------------------------------|-----------|
| 1  | 0.767 | 0.696 | 0.549 | 0.404 | 441       | Original                                                                          | No        |
| 2  | 0.761 | 0.693 | 0.545 | 0.403 | 231       | Eq. (2), used in this work                                                        | Yes       |
| 3  | 0.748 | 0.677 | 0.525 | 0.388 | 441       | Eq. (S1)                                                                          | Yes       |
| 4  | 0.752 | 0.682 | 0.536 | 0.397 | 441       | Eq. (S2)                                                                          | Yes       |
| 5  | 0.749 | 0.679 | 0.530 | 0.390 | 231       | Select a subset of channels with $x \leq y$ by the alphabeta order of amino acids | No        |
| 6  | 0.728 | 0.658 | 0.511 | 0.372 | 231       | Select a subset of channels with $x \geq y$ by the alphabeta order of amino acids | No        |

$$\text{Rcov}(i_x, j_y) = \begin{cases} \text{cov}(i_x, j_y), & \text{if } i \geq j, \\ \text{cov}(i_y, j_x), & \text{if } i < j, \end{cases} \quad (\text{S1})$$

$$\text{Rcov}(i_x, j_y) = \begin{cases} \text{cov}(i_x, j_y), & \text{if } i \leq j, \\ \text{cov}(i_y, j_x), & \text{if } i > j, \end{cases} \quad (\text{S2})$$



**Table S3.** The precisions for CCMpred and DeepMSA on the three benchmark datasets with MSAs generated from the Uniclust30 and the MetaDB databases. The data in the last row are the P-values are for the statistical tests between the data listed in the third and the fourth rows.

| Database   | CCMpred  |          |           | DeepMSA  |          |           |
|------------|----------|----------|-----------|----------|----------|-----------|
|            | SPOT-228 | CAMEO-41 | CASP12-38 | SPOT-228 | CAMEO-41 | CASP12-38 |
| Uniclust30 | 0.3792   | 0.3956   | 0.2437    | 0.6809   | 0.6374   | 0.5617    |
| MetaDB     | 0.469    | 0.4585   | 0.3822    | 0.7546   | 0.7323   | 0.7133    |
| P-value    | 2.83E-77 | 4.04E-17 | 3.52E-39  | 2.89E-63 | 4.20E-31 | 4.18E-47  |
